1  
2  
3  
4  
5  
6  
7  
8  
9  
10  
11  
12  
13  
14  
15  
16  
17  
18  
19  
20  
21  
22  
23  
24  
25  
26  
27  
28  
29  
30  
31

## **Students' perspectives on global surgery and its integration into formal medical education**

Nicholas Rennie<sup>a</sup> [nicholas.rennie@ugent.be](mailto:nicholas.rennie@ugent.be)

Eva Degraeuwe<sup>b</sup> [eva.degraeuwe@ugent.be](mailto:eva.degraeuwe@ugent.be)

Charlotte Deltour<sup>c</sup> [charlotte.deltour@ugent.be](mailto:charlotte.deltour@ugent.be)

Miryam Serry Senhaji<sup>a</sup> [miryam.serrysenhaji@ugent.be](mailto:miryam.serrysenhaji@ugent.be)

Margo Vandenheede<sup>a</sup> [margo.vandenheede@ugent.be](mailto:margo.vandenheede@ugent.be)

Frederik Berrevoet<sup>d</sup> [frederik.berrevoet@ugent.be](mailto:frederik.berrevoet@ugent.be)

Elke Van Daele<sup>e</sup> [elke.vandaele@uzgent.be](mailto:elke.vandaele@uzgent.be)

Wouter Willaert<sup>f</sup> [wouter.willaert@ugent.be](mailto:wouter.willaert@ugent.be)

### **Affiliations:**

<sup>a</sup> Faculty of Medicine and Health Sciences, Ghent University, C. Heymanslaan 10, 9000 Ghent, Belgium.

<sup>b</sup> Department of Paediatrics, Ghent University Hospital, C. Heymanslaan, 10, 9000 Ghent, Belgium.

<sup>c</sup> Department of Obstetrics and Gynaecology, Ghent University Hospital, C. Heymanslaan, 10, 9000 Ghent, Belgium.

<sup>d</sup> Department of General and Hepatobiliary Surgery and Liver Transplantation, Ghent University Hospital, C. Heymanslaan, 10, 9000 Ghent, Belgium.

<sup>e</sup> Department of Gastrointestinal Surgery, Ghent University Hospital, C. Heymanslaan, 10, 9000 Ghent, Belgium.

<sup>f</sup> Department of Human Structure and Repair, Ghent University, C. Heymanslaan 10, 9000 Ghent, Belgium

Corresponding author: Nicholas Rennie, Faculty of Medicine and Health Sciences, Ghent University, C. Heymanslaan 10, 9000 Ghent, Belgium; [nicholas.rennie@ugent.be](mailto:nicholas.rennie@ugent.be); +32495568286

## 32 **Abstract**

33 Global surgery is “an area of study, research, practice, and advocacy that seeks to  
34 improve health outcomes and achieve health equity for all people who require  
35 surgical care”. The Lancet Commission on Global Surgery strives for an additional  
36 2.28 million physicians in the global surgery workforce by 2030. Understanding how  
37 medical students perceive global surgery will be essential in educating the next  
38 generation of global surgeons, anaesthesiologists and obstetricians. This study  
39 investigated the knowledge, attitudes and exposure of Belgian medical students  
40 towards global surgery.

41 An anonymous online survey was distributed to first to final year medical students  
42 across Belgian universities using social media. Data was collected on demographics,  
43 exposure, knowledge, obstacles and attitudes of medical students towards global  
44 surgery. Odds ratios with 95% confidence intervals were calculated.

45 A total of 304 medical students participated from four Belgian universities. A minority  
46 of students reported having exposure to global surgery (24.7%). Most students were  
47 interested in gaining more exposure to global surgery (75.3%). Almost all students  
48 agreed (94.4%) that global surgery is a relevant topic for medical students, and most  
49 agreed (71%) that there should be more compulsory education on the topic. Only 13  
50 to 44% of students could correctly answer questions testing global surgery  
51 knowledge. Students reported multiple barriers to pursuing a career in global surgery.  
52 Belgian medical students’ global surgery knowledge and exposure is lacking despite  
53 clear interest in the field. Educating and supporting students will be essential in  
54 supporting them to take on careers in global surgery. These results advocate for the  
55 inclusion of pre-clinical global surgery seminars alongside equitable international  
56 clinical internships in formal medical education across Europe and worldwide.

## 57 **Introduction**

58 Global surgery is “an area of study, research, practice, and advocacy that seeks to  
59 improve health outcomes and achieve health equity for all people who require  
60 surgical care, with a special emphasis on underserved populations and populations  
61 in crisis” [1, 2]. Despite 16.9 million deaths occurring annually due to conditions  
62 requiring surgical care, substantially surpassing the number of deaths due to  
63 HIV/AIDS, tuberculosis and malaria combined, global surgery can still be regarded as  
64 the “neglected stepchild of global health” [3,4].

65 In 2015, the landmark Lancet Commission on Global Surgery 2030 highlighted  
66 important inequalities in access to surgical care worldwide, especially in low- and  
67 middle-income countries (LMIC) [2]. Each year, five billion people lack access to safe  
68 and affordable surgical and anaesthetic care, 33 million people face catastrophic  
69 health expenditure due to out of pocket payments and an additional 48 million due to  
70 non-medical costs related to surgical care. Basic surgical, anaesthetic and obstetric  
71 care in underserved populations could prevent 1.4 million deaths and 77.2 million  
72 Disability Adjusted Life Years (DALYs) annually [5]. Despite this knowledge, many  
73 misconceptions remain regarding surgery in LMICs as too expensive, complicated  
74 and inefficient compared to other facets of global health [2, 6, 7].

75 An estimated 2.28 million additional surgeons, anaesthesiologists and obstetricians  
76 are needed by 2030 to provide the additional 143 million surgical procedures needed  
77 annually [2]. An understanding of how medical students perceive the role of surgery  
78 in global health will therefore be essential in developing meaningful educational  
79 opportunities for the next generation of the global surgery workforce [7]. Knowledge  
80 of the obstacles faced by medical students when pursuing a career in global surgery  
81 will also be crucial in providing avenues of career development [8]. The few studies

82 that measured the knowledge, attitudes and exposure of medical students towards  
83 global surgery have highlighted a discrepancy between medical students' interest in  
84 global surgery and their lack of knowledge and exposure to this rapidly evolving field  
85 [7-11].

86 The aim of this study is to investigate the knowledge, attitudes and exposure of  
87 Belgian medical students towards global surgery and identify possible approaches to  
88 global surgery curricula development.

## 89 **Material and methods**

90 This study was approved by the institutional review board of the Ghent University  
91 Hospital (BC-10194). The survey was developed following a literature review to  
92 collect global surgery statistics and identify relevant questionnaires [1, 2, 7-9, 12].

93 The draft survey was reviewed by three attending surgeons, five medical students  
94 and members of the International Student Surgical Network (InciSion) Belgium, a  
95 student- and resident-led non-profit organisation regarding global surgery [13, 14].

96 The final survey created in Qualtrics software © 2022 (Provo, Utah, USA) provided a  
97 definition of global surgery and consisted of 28 main and 17 additional questions on  
98 demographics, exposure, interest, knowledge, obstacles and attitudes towards global  
99 surgery [1, 2]. Questions had multiple choice, free text, checklist, yes or no, ranking  
100 (one being the highest and seven the lowest) and Likert scale answers (S1  
101 Appendix).

102 The anonymous online survey was distributed to first to final year medical students  
103 across seven Belgian universities using social media. All participants provided written  
104 informed consent for anonymous data collection, storage and analysis. All data was  
105 handled confidentially and evaluated by researchers for scientific purposes only.

106 Data was analysed using RStudio statistics version 2022.02.3 (R Foundation,  
 107 Vienna, Austria). Descriptive statistics and crude odds ratios (OR) with 95%  
 108 confidence interval (CI) analysis between stage of medical education, gender and 12  
 109 selected survey questions were estimated using the “oddsratio.wald” function in  
 110 RStudio. Means and standard deviations (SD) for rankings were calculated using the  
 111 “sd” function in RStudio. Data from medical schools with less than 10 study  
 112 participants were excluded from the analysis to maintain a sufficient sample size per  
 113 institution [15].

## 114 Results

### 115 Demographics

116 A total of 304 responses were included from four universities: Ghent University  
 117 (57.2%, n = 174/304), the University of Antwerp (20.7%, n = 63/304), the Catholic  
 118 University of Leuven (12.2%, n = 37/304) and the University of Liège (9.9%, n =  
 119 30/304). Participants were first (14.5%), second (16.8%), third (24.7%), fourth  
 120 (15.8%), fifth (17.1%) and final year (11.2%) medical students. There were more  
 121 female than male participants (64.8% vs 34.2%). Odds ratios with 95% CI analysis  
 122 between stage of medical education (bachelor’s/master’s), gender (male/female) and  
 123 12 questions on attitudes, exposure and knowledge on global surgery are presented  
 124 in Table 1.

125 **Table 1** Association between (OR and 95% CI) gender and stage of education and attitudes, exposure  
 126 and knowledge on global surgery

|                                                                 | Gender <sup>a</sup> |                                     | Stage of Education |                                     |
|-----------------------------------------------------------------|---------------------|-------------------------------------|--------------------|-------------------------------------|
|                                                                 | Female              | Male                                | Bachelor’s         | Master’s                            |
| Global surgery is a relevant topic for medical students (Agree) | 1                   | <b>0.30*</b><br><b>(0.10, 0.84)</b> | 1                  | <b>0.31*</b><br><b>(0.11, 0.90)</b> |

|                                                                                                                                                      |   |                                     |   |                                     |
|------------------------------------------------------------------------------------------------------------------------------------------------------|---|-------------------------------------|---|-------------------------------------|
| There should be more compulsory teaching related to Global Surgery (Agree)                                                                           | 1 | 0.73<br>(0.43, 1.21)                | 1 | <b>0.44*</b><br><b>(0.27, 0.73)</b> |
| Have you heard of the International Student Surgical Network (InciSioN)? (Yes)                                                                       | 1 | <b>2.14*</b><br><b>(1.28, 3.57)</b> | 1 | <b>2.0*</b><br><b>(1.21, 3.31)</b>  |
| Have you had exposure to Global Surgery? (Yes)                                                                                                       | 1 | 1.09<br>(0.63, 1.88)                | 1 | <b>1.76*</b><br><b>(1.04, 2.98)</b> |
| Are you interested in gaining more exposure to Global Surgery? (Yes)                                                                                 | 1 | 0.74<br>(0.35, 1.57)                | 1 | <b>0.14*</b><br><b>(0.06, 0.36)</b> |
| I am interested in/currently pursuing a career in surgery (Agree)                                                                                    | 1 | 1.43<br>(0.89, 2.32)                | 1 | <b>0.48*</b><br><b>(0.31, 0.77)</b> |
| I am interested in/currently pursuing a career in global surgery (Agree)                                                                             | 1 | 1.02<br>(0.62, 1.67)                | 1 | 0.66<br>(0.41, 1.07)                |
| I am interested in/currently pursuing a career in global health (Agree)                                                                              | 1 | <b>0.60*</b><br><b>(0.36, 0.99)</b> | 1 | 0.78<br>(0.49, 1.26)                |
| How many people around the world lack timely access to safe, affordable surgical and anaesthesia care when needed? (Answered correctly)              | 1 | <b>1.74*</b><br><b>(1.01, 3.0)</b>  | 1 | 0.76<br>(0.44, 1.30)                |
| Approximately how many additional surgical procedures each year could keep mortality and morbidity to a minimum worldwide? (Answered correctly)      | 1 | <b>1.81*</b><br><b>(1.04, 3.17)</b> | 1 | 1.16<br>(0.67, 2.01)                |
| What percentage of the population in low- and middle-income countries have access to safe, affordable and timely surgical care? (Answered correctly) | 1 | 0.98<br>(0.61, 1.58)                | 1 | 0.92<br>(0.58, 1.45)                |
| What percentage of the population in high-income countries have access to safe, affordable and timely surgical care? (Answered correctly)            | 1 | 1.43<br>(0.89, 2.31)                | 1 | <b>1.91*</b><br><b>(1.21, 3.03)</b> |

127 <sup>a</sup> 1 non-binary student and 2 students who preferred not to disclose their gender were excluded from  
128 this analysis

129 \* Indicates statistical significance

130

### 131 **Exposure and interest**

132 A minority of students reported having been exposed to global surgery (24.7%, n =  
133 75/304), with social media being the most frequent medium among those exposed  
134 (62.7%, n = 47/75) (Figure 1). Master's students were almost twice as likely to have  
135 had exposure than bachelor's students (OR 1.76). Few students had heard of  
136 InciSioN (28.6%, n = 87/304) and even less had taken part in any of InciSioN's

137 activities (2.3%, n = 7/304). Male students and master's students were twice likely to  
138 have heard of InciSioN (OR 2.14 and 2.0, respectively). Most students were  
139 interested in gaining more exposure to global surgery (75.3%, n = 223/296) but  
140 master's students were less likely to be interested (OR 0.14). The most preferred  
141 methods of additional exposure were optional teaching programmes at medical  
142 school (55.7%, n = 165), events (53%, n = 157), clinical internships (51%, n = 151)  
143 and required teaching programmes (45.3%, n = 134) (Figure 1). When asked to rank  
144 which of seven global surgery aspects they would like to learn more about, students  
145 scored clinical aspects the highest ( $1.5 \pm 1.08$ ) followed by educational ( $3.72 \pm 1.76$ ),  
146 cultural ( $3.78 \pm 1.63$ ), ethical ( $4.11 \pm 1.65$ ), organisational ( $4.71 \pm 1.61$ ), research  
147 ( $4.95 \pm 1.79$ ) and economic aspects ( $5.23 \pm 1.8$ ).

148 **Fig. 1** Reported versus preferred methods of global surgery exposure

### 149 **Attitudes and education**

150 More students were moderately (43.1%, n = 131/304) or slightly familiar (39.8%, n =  
151 121/304) with global health while only slightly familiar (37.8%, n = 115/304) or not  
152 familiar at all (52%, n = 158/304) with global surgery. Most students reported that  
153 global health was sometimes (51%, n = 155/304) or rarely (35.5%, n = 108/304)  
154 incorporated while global surgery was only rarely (57.9%, n = 176/304) or never  
155 incorporated (24%, n = 73/304) into their required medical school curriculum. While  
156 almost all students agreed [strongly (49.3%, n = 150/304) or somewhat (45%, n =  
157 137/304)] that global surgery is a relevant topic for medical students, male students  
158 compared to female and master's compared to bachelor's students were less likely to  
159 agree (OR 0.30 and 0.31 respectively). Most students agreed [strongly (26.6%, n =  
160 84/304) or somewhat (43.4%, n = 132/304)] that there should be more compulsory

161 teaching related to global surgery (Figure 2), but master's students were less  
162 interested in a compulsory global surgery curriculum (OR 0.44).

163 **Fig. 2** Familiarity, relevance and incorporation of global surgery in student's medical education

## 164 **Knowledge**

165 Overall, knowledge on global surgery was poor. Only 23.9% of students (n = 72/304)  
166 could correctly identify that five billion people lack access to timely, safe and  
167 affordable surgical care and only 21.7% (n = 66/304) knew that approximately 150  
168 million additional surgical procedures are needed annually. Male students were more  
169 likely to answer these two questions correctly (OR 1.74 and 1.81). Less than half of  
170 students (44.4%, n = 135/304) correctly identified that only 10 to 30% of the  
171 population in LMICs have access to timely, safe and affordable surgical care and only  
172 44.1% of students (n = 134/304) were aware that over 80% of the population in high-  
173 income countries (HIC) have access to surgical care. Few (12.8%, n = 39/304) knew  
174 the three Bellwether procedures and only a minority of students (21%, n = 64/304)  
175 could identify main stakeholders in global surgery (Table 2).

176 **Table 2** Responses to knowledge-based global surgery questions<sup>a</sup>

|                                                                                                                                  | Correct | Incorrect | "I do not know" |
|----------------------------------------------------------------------------------------------------------------------------------|---------|-----------|-----------------|
| Approximately how many people around the world lack timely access to safe, affordable surgical and anaesthesia care when needed? | 24%     | 51%       | 25%             |
| Approximately how many additional surgical procedures each year could keep mortality and morbidity to a minimum worldwide?       | 22%     | 23%       | 45%             |
| What percentage of the population in low- and middle-income countries have access to safe, affordable and timely surgical care?  | 44%     | 33%       | 22%             |
| What percentage of the population in high-income countries have access to safe, affordable and timely surgical care?             | 44%     | 40%       | 15%             |



|                                                                     |     |     |     |
|---------------------------------------------------------------------|-----|-----|-----|
| Which of these is NOT a Bellwether procedure?                       | 13% | 4%  | 84% |
| Which of the following is NOT a main stakeholder in global surgery? | 21% | 11% | 68% |

177 <sup>a</sup> Responses rounded to the nearest number

## 178 **Aspirations and obstacles**

179 About half of the students were interested in pursuing a career in surgery (53.3%, n =  
180 162/304), though master's students were less likely to than bachelor's students (OR  
181 0.48). More than one in three were interested in a career in global surgery (35.9%, n  
182 = 109/304) or global health (37.5%, n = 114/304). Male students were less likely to  
183 pursue global health as a career (OR 0.60). Students were not (57.2%, n = 174/304)  
184 or only slightly familiar (29.9%, n = 91) with what global surgery means as a career,  
185 and most students found pursuing a career in global surgery to be only slightly  
186 (45.7%, n = 139/304) or moderately feasible (44.7%, n = 136/304). The most  
187 commonly perceived obstacles to a career in global surgery were personal or family  
188 responsibilities (42.8%, n = 130/304), language barriers (42.1%, n = 128/304), lack of  
189 established career paths in global surgery (39.1%, n = 119/304), financial constraints  
190 (34.5%, n = 105/304), and a lack of surgical role models and mentorship (33.6%, n =  
191 102/304) (Figure 3).

192 **Fig. 3** Reported obstacles to pursuing a career in global surgery

## 193 **Discussion**

194 To our knowledge this is the first study to quantitatively assess the current  
195 knowledge, attitudes and exposure of medical students towards global surgery in a  
196 European setting. We found basic knowledge regarding global surgery to be lacking  
197 despite a profound interest among students. Despite almost all medical students  
198 finding it to be a relevant topic and many wanting more global surgery education, few

199 had been exposed to global surgery. Multiple barriers to pursuing a career in global  
200 surgery were reported.

201 Grasping a basic knowledge of global surgery as an essential component of global  
202 health is a first step for medical students in recognizing the urgent need for safe and  
203 affordable surgical care worldwide [2]. Belgian students were less familiar with global  
204 surgery than with global health and had poor knowledge on its key aspects. Our  
205 findings of a lack of knowledge among students are similar to those observed in the  
206 UK, USA and LMICs, but results are challenging to compare due to a lack of  
207 standardized questions [7-11]. This lack of knowledge likely feeds the misconceptions  
208 of global surgery being too specific, not tackling a significant burden of disease or not  
209 being cost-effective [7, 10, 16]. Providing all medical students with only a rudimental  
210 understanding of the inequalities in surgical care could already be a catalyst towards  
211 expanding the global surgery community [7, 10, 17]. This lack of knowledge was  
212 echoed by a general lack of exposure with only one in four students being exposed.

213 Despite students' interest, global surgery exposure opportunities for medical students  
214 currently remain limited [17]. Allowing diverse and accessible global surgery  
215 exposure from early on in a medical student's career is critical to increasing their  
216 participation as residents and doctors [11, 17].

217 Involving and educating medical students will form a crucial component in increasing  
218 the global surgery workforce by 2.28 million by 2030, one of the goals set by the  
219 Lancet Commission on Global Surgery [2, 17]. Most (95%) students agreed that  
220 global surgery is a relevant topic and 70% agreed that there should be more  
221 compulsory teaching on this subject. Three-quarters of students were interested in  
222 gaining more exposure to global surgery. Despite social media being the most  
223 common method of previous exposure, students did not prefer this method. They

224 preferred optional teaching, events, clinical internships and required teaching as  
225 possible exposure opportunities. This reinforces the notion that students are a  
226 requesting party in integrating global surgery as a component of formal medical  
227 education [11, 18]. Nevertheless, global surgery was rarely incorporated into Belgian  
228 medical curricula, placing a burden on local stakeholders and initiatives to create  
229 global surgery workshops, lectures and conferences. Our findings reflect those in  
230 other countries, where medical schools have historically struggled to incorporate  
231 global surgery and global health into their curricula [11, 17, 19]. This increased  
232 understanding of students' desires will be fundamental in guiding the development of  
233 meaningful exposure opportunities in the future [17, 20].  
234 Few established pre-clinical courses on global surgery exist [21, 22]. Novel global  
235 surgery curricula have emphasized a tailored approach based on a student's  
236 progression through medical school [19, 21-24]. In our study, master's students were  
237 less interested in additional exposure to global surgery, less likely to agree that it is a  
238 relevant topic and less likely to want compulsory global surgery education. This  
239 confirms that seminars providing basic knowledge, tackling common misconceptions  
240 and discussing cost-effectiveness, ethical considerations and health systems  
241 management should be primarily directed towards bachelor's students [7, 19]. These  
242 pre-clinical seminars could be complemented by international internship opportunities  
243 to motivated students in the clinical years [7, 17, 23]. Current international internship  
244 opportunities are often short and unilateral, running the risk of straining local health  
245 systems and harming patients or falling into medical tourism and neo-colonialism [19,  
246 21, 24]. Instead, clinical global surgery internships should be equitable, bidirectional  
247 and beneficial for both visitors and hosts [24-27]. To achieve this, providing

248 appropriate pre-departure training and guidance in collaboration with the host country  
249 should be an ethical imperative [7, 24].

250 Students reported several obstacles to pursuing a career in global surgery, primarily  
251 personal responsibilities, language barrier, lack of established career paths, financial  
252 constraints and a lack of role models/mentorship. These findings are dissimilar to  
253 those reported by Mehta et al., who found common obstacles to be constrained time  
254 to travel, increased length of training, providing care in resource-limited settings and  
255 a lack of established career paths, respectively [7]. While personal responsibilities are  
256 inevitable, preparatory language courses and financial support could be provided.

257 The recommendations of the Global Surgery 2030 roadmap for HIC schools and  
258 training programs are especially relevant, advocating to “endorse global surgery as  
259 an established career path for trainees” and “provide logistical, financial and  
260 mentorship support for trainees interested in pursuing global surgery endeavours”  
261 [28]. Creating clear career paths and opportunities while providing a broad support  
262 and mentorship network will be crucial in lowering the threshold for medical students  
263 to aspire for careers within global surgery.

264 We acknowledge limitations to this study. The population was not a random sample  
265 of all medical students enrolled at Belgian universities. Only four of the seven  
266 contacted institutions were included, three of the four being in Flemish speaking  
267 regions, and not all medical students at each university responded. This possibly  
268 introduced a selection bias with students with greater interest being more likely to  
269 participate. The proportion of students having exposure and wanting additional  
270 exposure may therefore be an overestimate. In addition, there is no validated  
271 questionnaire to assess knowledge, attitudes and exposure to global surgery. As

272 such our results are challenging to compare to previous literature. Lastly, results are  
273 not directly generalizable to other countries, especially countries outside of Europe.

## 274 **Conclusions**

275 In conclusion, Belgian medical students' knowledge and exposure towards global  
276 surgery is lacking despite a profound interest in the field. Medical students across the  
277 globe will be tomorrow's 2.28 million physicians needed in the global surgery  
278 workforce of 2030, providing increased access to safe, timely and affordable surgical,  
279 anaesthetic and obstetric care for all. Local, national and international global surgery  
280 curricula development will be essential to support these students in taking on careers  
281 in global surgery. These results advocate for the inclusion of pre-clinical global  
282 surgery seminars alongside equitable and bilateral international clinical internships in  
283 formal undergraduate medical education in Europe and worldwide.

## 284 **Acknowledgements**

285 We would like to thank the InciSioN Belgium team and the Belgian Medical Student's  
286 Association for their assistance in disseminating the survey.

287

## 288 References

- 289 1. Dare AJ, Grimes CE, Gillies R, Greenberg SL, Hagander L, Meara JG, et al. Global surgery:  
290 defining an emerging global health field. *Lancet*. 2014;384:2245-2247. DOI: 10.1016/S0140-  
291 6736(14)60237-3
- 292 2. Meara JG, Greenberg SL. The Lancet Commission on Global Surgery Global surgery 2030:  
293 Evidence and solutions for achieving health, welfare and economic development. *Surgery*.  
294 2015;157:834-835. DOI: 10.1016/j.surg.2015.02.009
- 295 3. Farmer PE, Kim JY. Surgery and global health: a view from beyond the OR. *World J Surg*.  
296 2008;32:533-536. DOI: 10.1007/s00268-008-9525-9
- 297 4. Lozano R, Naghavi M, Foreman K, Lim S, Shibuya K, Aboyans V, et al. Global and regional  
298 mortality from 235 causes of death for 20 age groups in 1990 and 2010: a systematic analysis  
299 for the Global Burden of Disease Study 2010. *Lancet*. 2012;380:2095-2128. DOI:  
300 10.1016/S0140-6736(12)61728-0
- 301 5. Bickler SN, Weiser TG, Kassebaum N, Higashi H, Chang DC, Barendregt JJ, et al. Global Burden  
302 of Surgical Conditions. In: Debas HT, Donkor P, Gawande A, Jamison DT, Kruk ME, Mock CN,  
303 eds. *Essential Surgery: Disease Control Priorities, Third Edition (Volume 1)*. Washington (DC):  
304 The International Bank for Reconstruction and Development / The World Bank
- 305 © 2015 International Bank for Reconstruction and Development / The World Bank.; 2015.
- 306 6. Farmer P. Dispelling myths about surgery's role in global health. Investing in Health: World  
307 Bank Blogs; 2015. Accessed 9 October 2022. [https://blogs.worldbank.org/health/dispelling-](https://blogs.worldbank.org/health/dispelling-myths-about-surgery-s-role-global-health)  
308 [myths-about-surgery-s-role-global-health](https://blogs.worldbank.org/health/dispelling-myths-about-surgery-s-role-global-health).
- 309 7. Mehta A, Xu T, Murray M, Casey KM. Medical Student Perceptions of Global Surgery at an  
310 Academic Institution: Identifying Gaps in Global Health Education. *Acad Med*. 2017;92:1749-  
311 1756. DOI: 10.1097/ACM.0000000000001832
- 312 8. International Survey of Medical Students Exposure to Relevant Global Surgery (ISOMERS): A  
313 Cross-Sectional Study. *World J Surg*. 2022;46:1577-1584. DOI: 10.1007/s00268-022-06440-0
- 314 9. Kanmounye US, Mbonda AN, Djiofack D, Daya L, Pokam OF, Ghomsi NC. Exploring the  
315 knowledge and attitudes of Cameroonian medical students towards global surgery: A web-  
316 based survey. *PLoS One*. 2020;15:e0232320. DOI: 10.1371/journal.pone.0232320
- 317 10. Abraham MN, Abraham PJ, Chen H, Hendershot KM. What is global surgery? Identifying  
318 misconceptions among health professionals. *Am J Surg*. 2020;220:271-273. DOI:  
319 10.1016/j.amjsurg.2019.11.021
- 320 11. Scott EM, Fallah PN, Blitzer DN, NeMoyer RE, Sifri Z; Global Surgery Student Alliance (GSSA),  
321 et al. Next Generation of Global Surgeons: Aligning Interest With Early Access to Global  
322 Surgery Education. *J Surg Res*. 2019;240:219-226. DOI: 10.1016/j.jss.2019.03.009
- 323 12. Alkire BC, Raykar NP, Shrimel MG, Weiser TG, Bickler SW, Rose JA, et al. Global access to  
324 surgical care: a modelling study. *Lancet Glob Health*. 2015;3:e316-323. DOI: 10.1016/S2214-  
325 109X(15)70115-4
- 326 13. International Student Surgical Network (InciSioN). 2022. Accessed 9 October 2022.  
327 <https://incisionetwork.org/>.
- 328 14. Vervoort D, Bentounsi Z. InciSioN: Developing the Future Generation of Global Surgeons. *J*  
329 *Surg Educ*. 2019;76:1030-1033. DOI: 10.1016/j.jsurg.2019.02.008
- 330 15. Rennie N, Degraeuwe E, Deltour C, et al. Students' perspectives on global surgery and its  
331 integration into formal medical education. Mendeley Data. Version 2. 21 November 2022.  
332 DOI: 10.17632/93gwsz8xt4.2
- 333 16. Bae JY, Groen RS, Kushner AL. Surgery as a public health intervention: common  
334 misconceptions versus the truth. *Bull World Health Organ*. 2011;89:394. DOI:  
335 10.2471/BLT.11.088229

- 336 17. Gosselin-Tardif A, Butler-Laporte G, Vassiliou M, Khwaja K, Ntakiyiruta G, Kyamanywa P, et al.  
337 Enhancing medical students' education and careers in global surgery. *Can J Surg*.  
338 2014;57:224-225. DOI: 10.1503/cjs.027713  
339 18. Patel R, Khundkar R, Peter N, Turner J, Edgcombe H, Makins A, et al. Improving global surgery  
340 education for trainees. *IJS Global Health*. 2019;2. DOI: 10.1097/GH9.000000000000007  
341 19. Moren A, Cook M, McClain M, Doberne J, Kiraly L, Perkins RS, et al. A pilot curriculum in  
342 international surgery for medical students. *J Surg Educ*. 2015;72:e9-e14. DOI:  
343 10.1016/j.jsurg.2015.04.027  
344 20. Tannan SC, Gampper TJ. Resident Participation in International Surgical Missions is Predictive  
345 of Future Volunteerism in Practice. *Arch Plast Surg*. 2015;42:159-163. DOI:  
346 10.5999/aps.2015.42.2.159  
347 21. Anderson GA, Albutt K, Holmer H, Muguti G, Mbuwayesango B, Muchuweti D, et al.  
348 Development of a Novel Global Surgery Course for Medical Schools. *J Surg Educ*.  
349 2019;76:469-479. DOI: 10.1016/j.jsurg.2018.07.026  
350 22. Jayaram A, Pawlak N, Kahanu A, Fallah P, Chung H, Valencia-Rojas N, et al. Academic Global  
351 Surgery Curricula: Current Status and a Call for a More Equitable Approach. *J Surg Res*. 2021  
352 Nov;267:732-744. doi: 10.1016/j.jss.2021.03.061. DOI: 10.1016/j.jss.2021.03.061  
353 23. Kühner S, Ekblad S, Larsson J, Löfgren J. Global surgery for medical students - is it  
354 meaningful? A mixed-method study. *PLoS One*. 2021;16:e0257297. DOI:  
355 10.1371/journal.pone.0257297  
356 24. Zivanov CN, Joseph J, Pereira DE, MacLeod JBA, Kauffmann RM. Qualitative Analysis of the  
357 Host-Perceived Impact of Unidirectional Global Surgery Training in Kijabe, Kenya: Benefits,  
358 Challenges, and a Desire for Bidirectional Exchange. *World J Surg*. 2022;46:2570-2584. DOI:  
359 10.1007/s00268-022-06692-w  
360 25. Grant CL, Robinson T, Al Hinai A, Mack C, Guilfoyle R, Saleh A. Ethical considerations in global  
361 surgery: a scoping review. *BMJ Glob Health*. 2020;5:e002319. DOI: 10.1136/bmjgh-2020-  
362 002319  
363 26. Bozinoff N, Dorman KP, Kerr D, Roebbelen E, Rogers E, Hunter A, et al. Toward reciprocity:  
364 host supervisor perspectives on international medical electives. *Med Educ*. 2014;48:397-404.  
365 DOI: 10.1111/medu.12386  
366 27. Kumwenda B, Dowell J, Daniels K, Merrylees N. Medical electives in sub-Saharan Africa: a  
367 host perspective. *Med Educ*. 2015;49:623-633. DOI: 10.1111/medu.12727  
368 28. Ng-Kamstra JS, Greenberg SLM, Abdullah F, Amado V, Anderson GA, Cossa M, et al. Global  
369 Surgery 2030: a roadmap for high income country actors. *BMJ Glob Health*. 2016;1:e000011.  
370 DOI: 10.1136/bmjgh-2015-000011

371  
372

373 Supporting information caption:

374 S1 Appendix: Online survey for medical students regarding global surgery

375

376

377

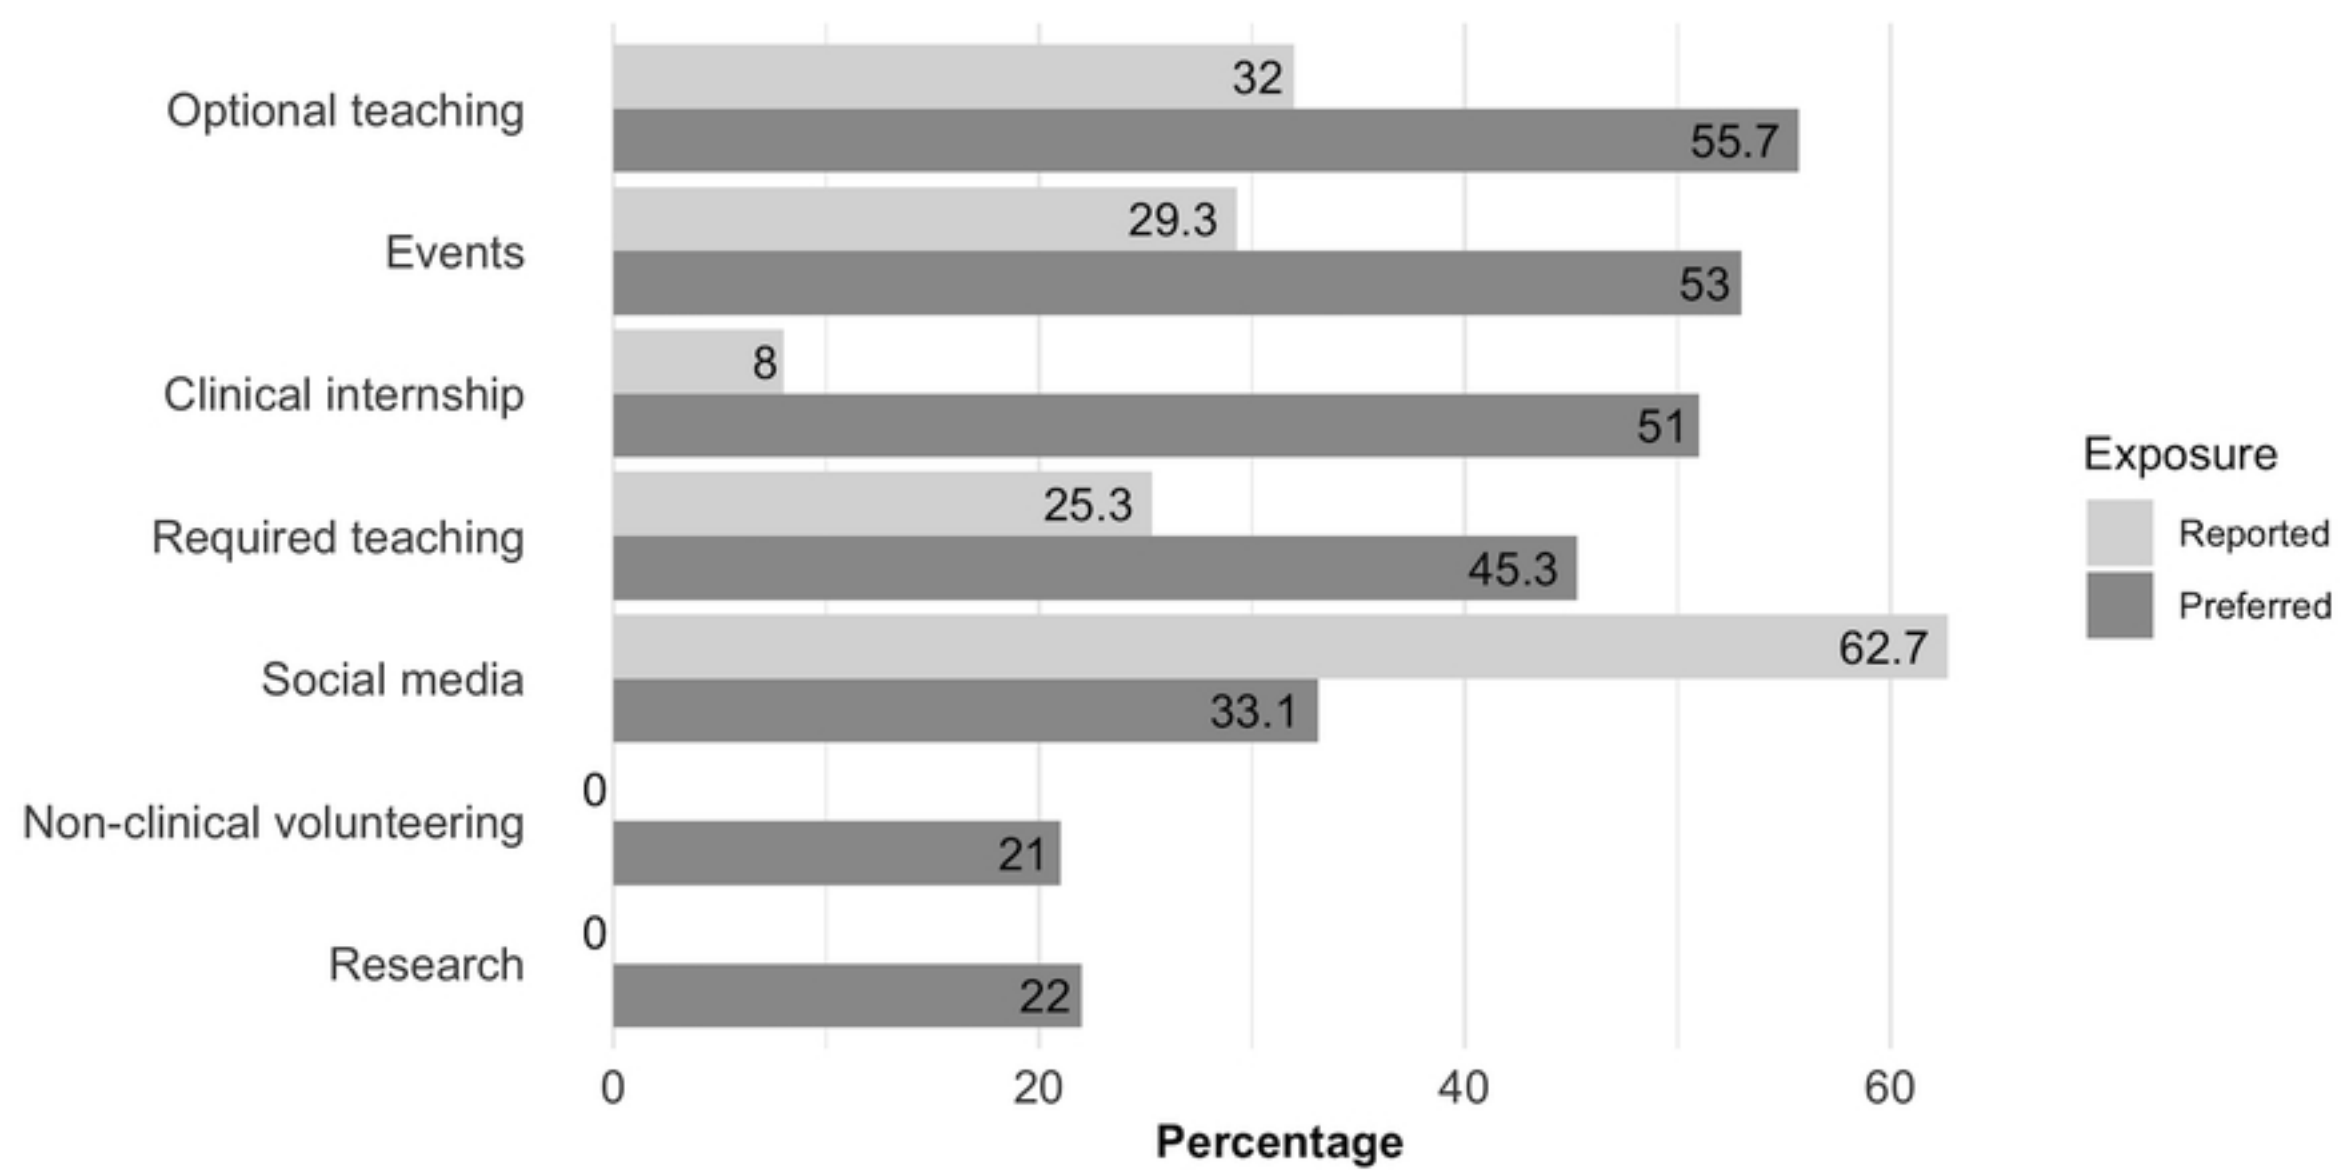

Figure 1



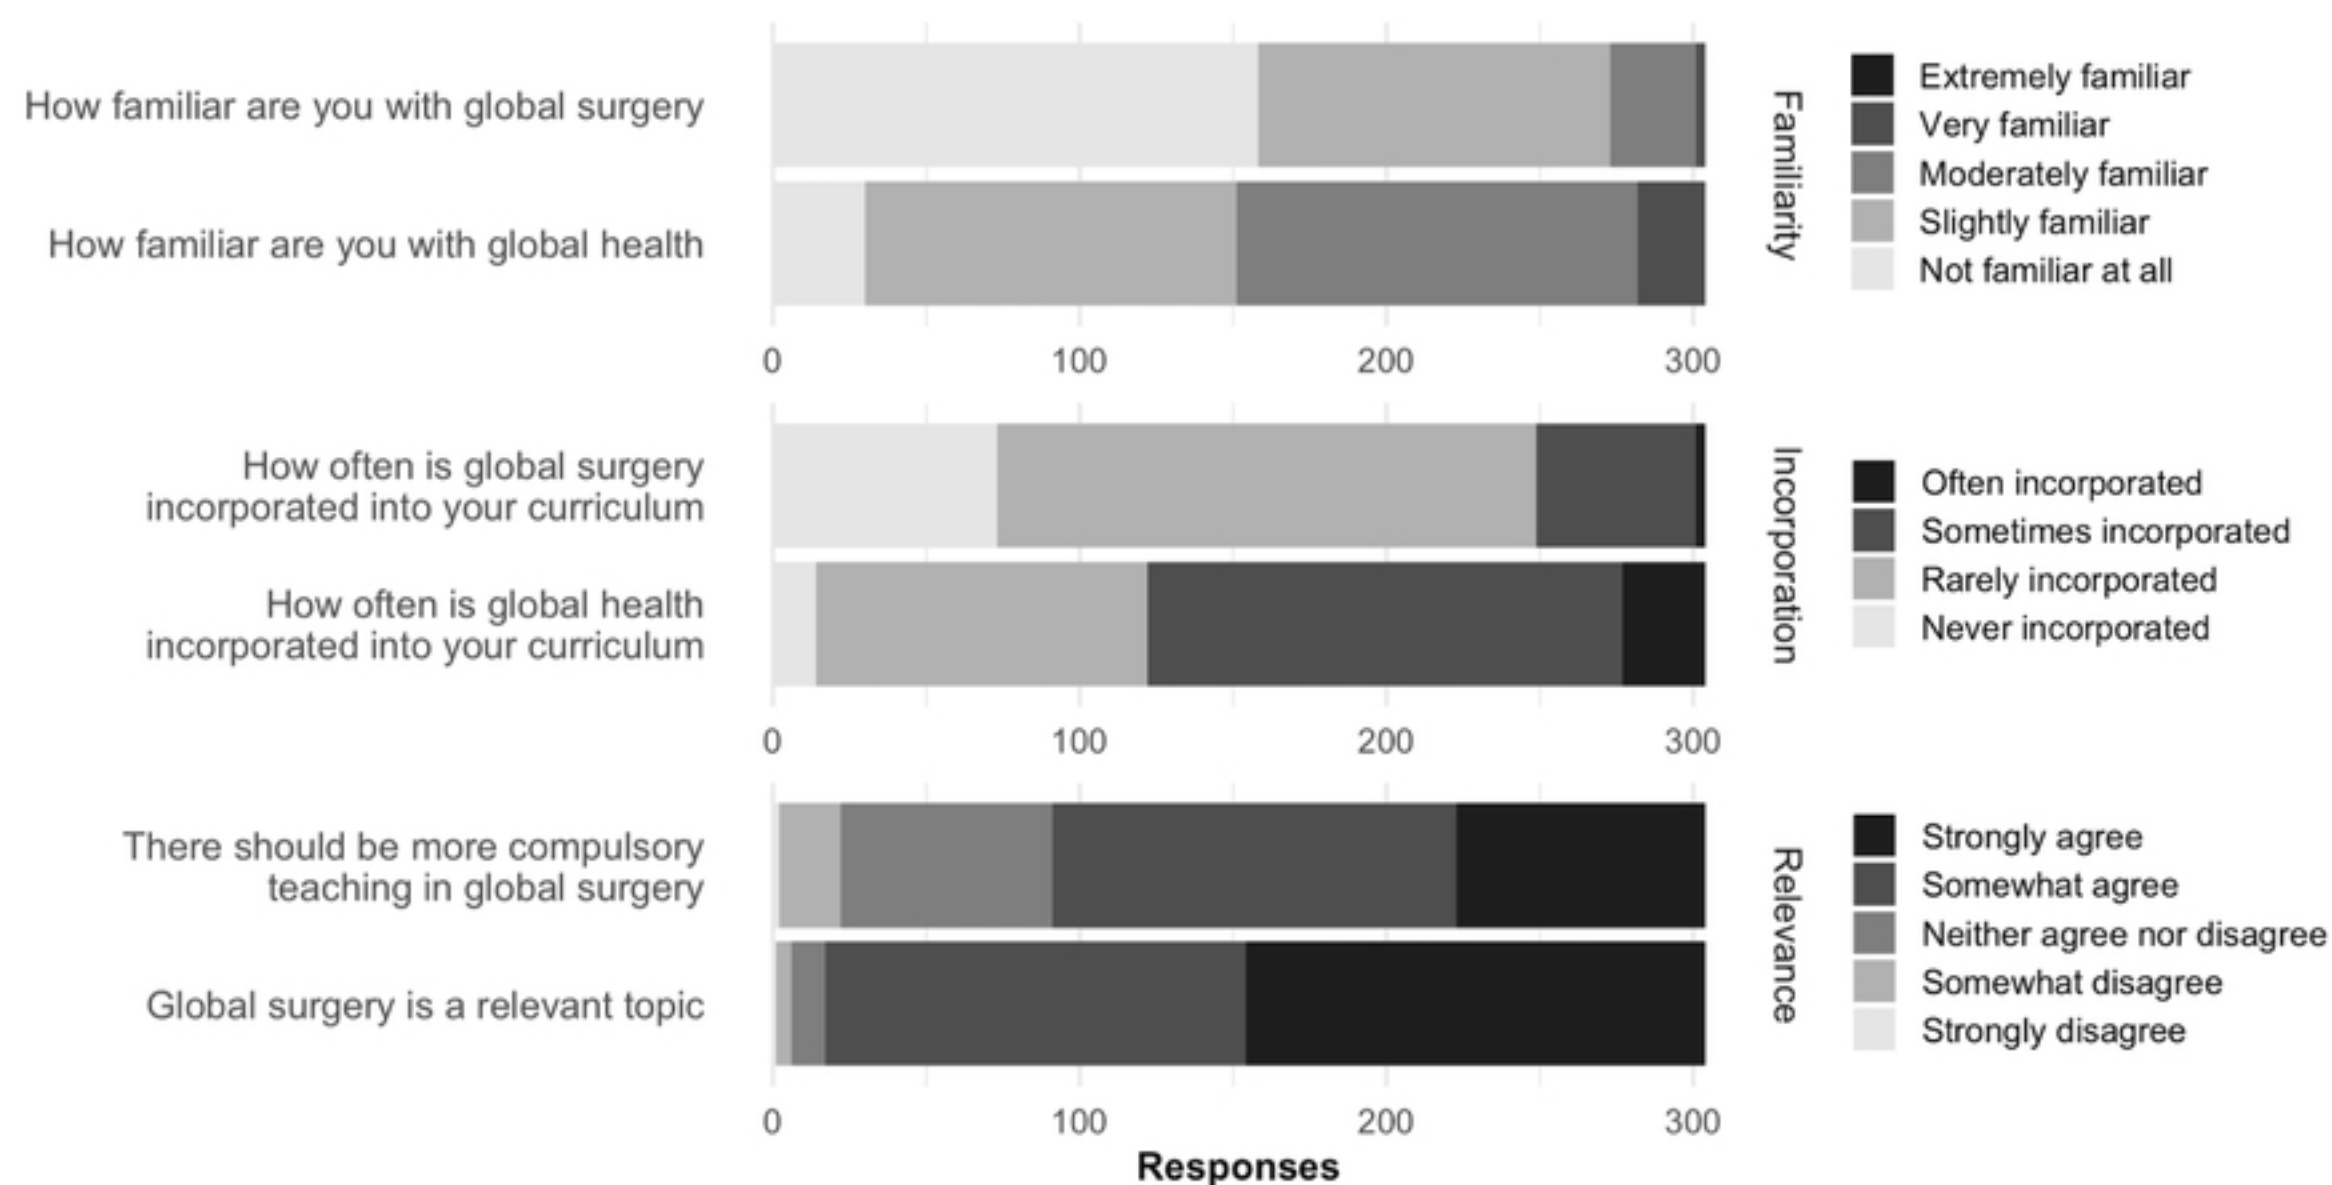

Figure 2

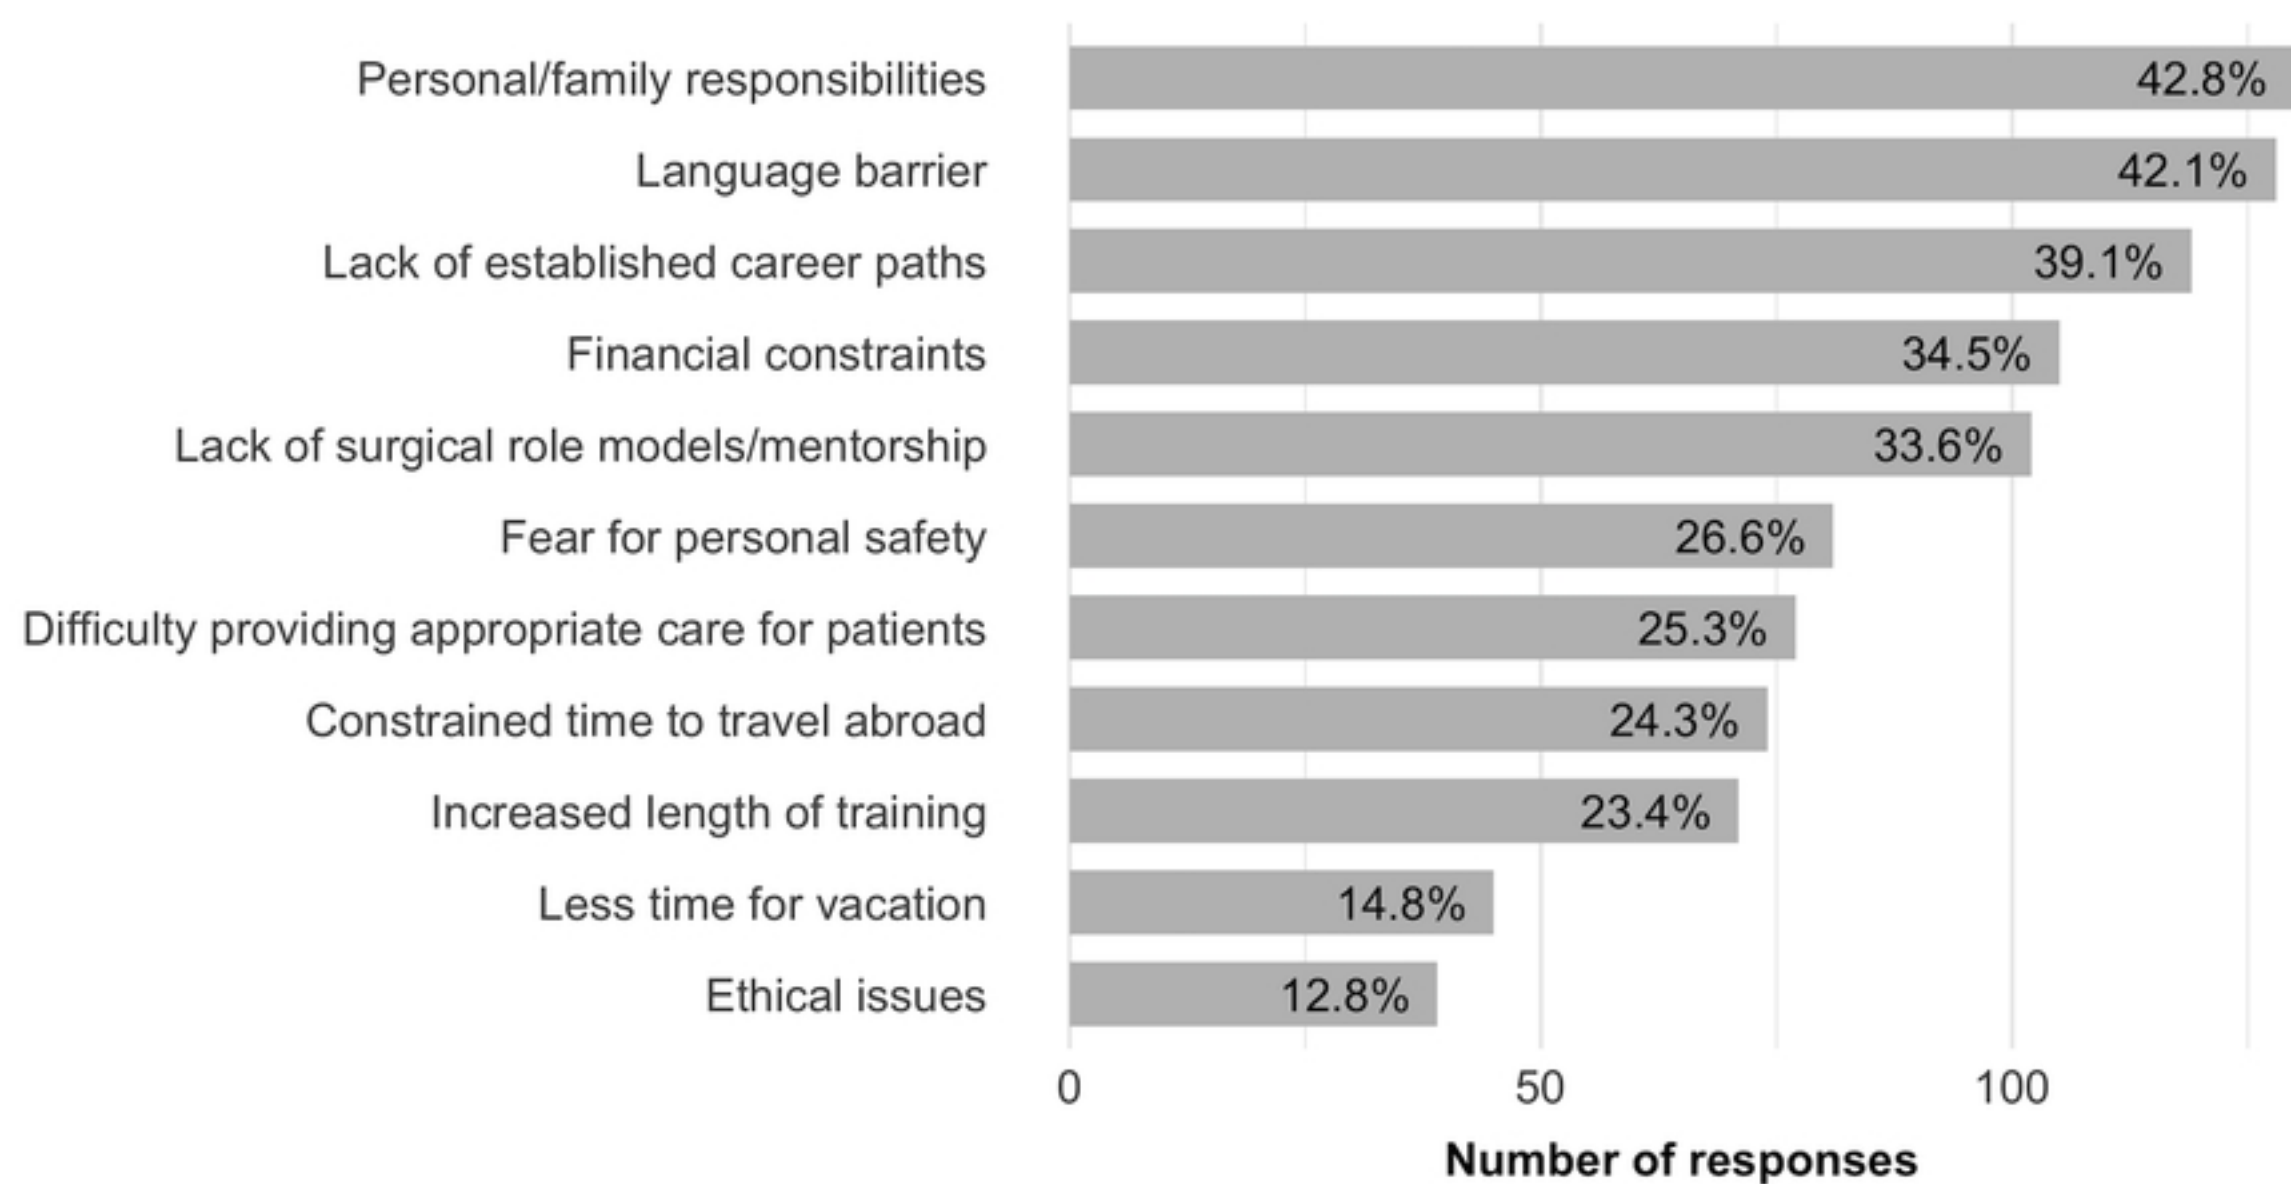

Figure 3
